# Supplementary material for: The cross-substitution effect of tantalum on the visible-light-driven water oxidation activity of BaNbO2N crystals grown directly by an NH3-assisted flux method
Source: Royal Society of Chemistry journal article supplement (doi:10.1039/c6ta03786k), 2016-01-01
Supplement: c6ta03786k1.pdf [file c6ta03786k1.pdf]

## **Electronic Supplementary Information (ESI)**

# **Cross-Substitution Effect of Tantalum on Visible-Light-Driven Water Oxidation Activity of BaNbO<sub>2</sub>N Crystals Grown Directly by an NH<sub>3</sub>-Assisted Flux Method**

Mirabbos Hojamberdiev<sup>1</sup>, Ehsan Zahedi<sup>2</sup>, Ela Nurlaela<sup>3</sup>, Kenta Kawashima<sup>1</sup>, Kunio Yubuta<sup>4</sup>,  
Masanobu Nakayama<sup>5</sup>, Hajime Wagata<sup>6</sup>, Tsutomu Minegishi<sup>3</sup>, Kazunari Domen<sup>3</sup>, and  
Katsuya Teshima<sup>1,7,\*</sup>

<sup>1</sup>Department of Environmental Science and Technology, Faculty of Engineering, Shinshu  
University, 4-17-1 Wakasato, Nagano 380-8553, Japan

<sup>2</sup>Department of Physical Chemistry, Shahrood Branch, Islamic Azad University, Shahrood,  
Iran

<sup>3</sup>Department of Chemical System Engineering, School of Engineering, the University of  
Tokyo, 7-3-1 Hongo, Bunkyo-ku, Tokyo 113-8656, Japan

<sup>4</sup>Institute for Materials Research, Tohoku University, 2-1-1 Katahira, Aoba-ku, Sendai 980-  
8577, Japan

<sup>5</sup>Department of Materials Science and Engineering, Nagoya Institute of Technology, Gokiso,  
Showa, Nagoya, Japan

<sup>6</sup>Department of Applied Chemistry, Meiji University, 1-1-1-D615 Higashimita, Tama, 214-  
8571 Kawasaki, Japan

<sup>7</sup>Center for Energy and Environmental Science, Shinshu University, 4-17-1 Wakasato,  
Nagano 380-8553, Japan

---

\*Corresponding Author: E-mail: [teshima@shinshu-u.ac.jp](mailto:teshima@shinshu-u.ac.jp); Phone: +81 26 269 5556

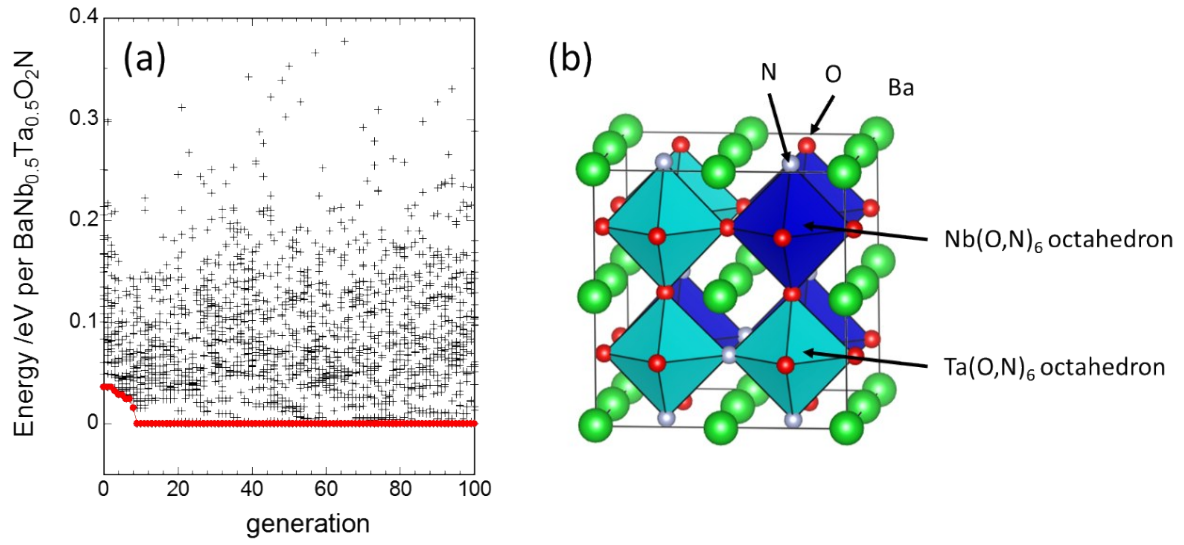

**Figure S1.** (a) Variation of total electron energies for genetic algorithm (GA)-driven structures as a function of generation (as an example of BaNb<sub>0.5</sub>Ta<sub>0.5</sub>O<sub>2</sub>N). The red symbol indicates the lowest energy of GA-generated structures among present and previous generations. (b) Optimized Nb/Ta and O/N arrangement for BaNb<sub>0.5</sub>Ta<sub>0.5</sub>O<sub>2</sub>N. The green, red and gray colored spheres correspond to Ba, O and N ions, respectively. The darker and lighter blue octahedra correspond to Nb(O,N)<sub>6</sub> and Ta(O,N)<sub>6</sub>, respectively.

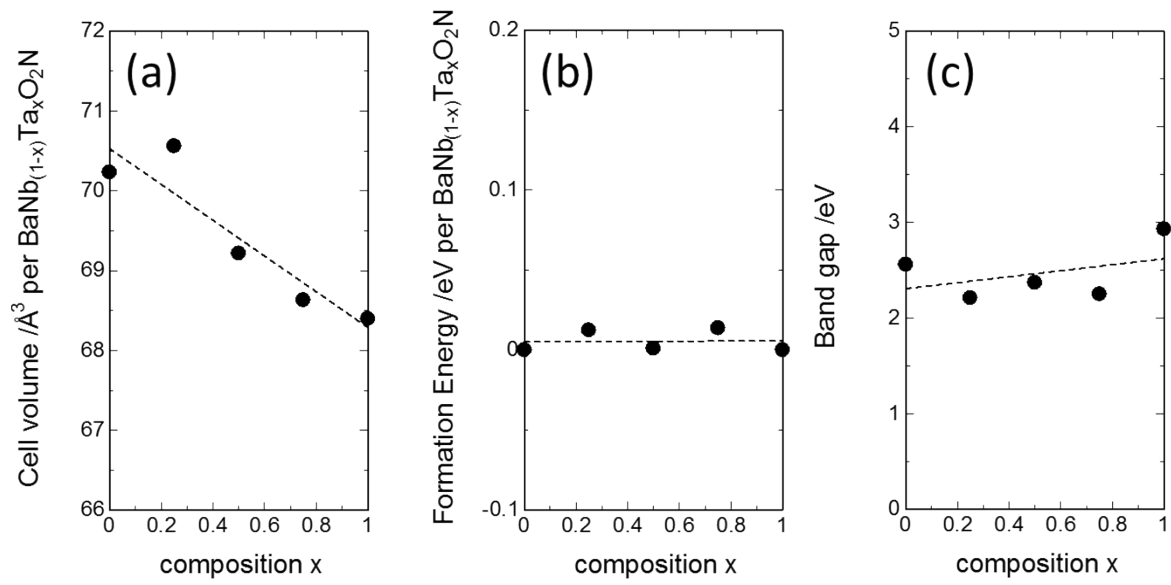

**Figure S2.** (a) Cell volume, (b) formation energy, and (c) band gap for  $\text{BaNb}_{1-x}\text{Ta}_x\text{O}_2\text{N}$  as a function of  $x$  calculated by HSE06 functional.
